# Supplementary material for: REsearch into implementation STrategies to support patients of different ORigins and language background in a variety of European primary care settings (RESTORE): study protocol
Source: PubMed Central journal article supplement (PMC3541149; doi:10.1186/1748-5908-7-111), 2012-11-20

**EUROPEAN COMMISSION**

**RESEARCH DIRECTORATE-GENERAL**

SP1-Cooperation

Collaborative project

Small or medium-scale focused research project

FP7-HEALTH-2010-two-stage

**Grant Agreement Number 257258**

**RESTORE**

REsearch into implementation STRategies to support patients of  
different ORigins and language background in a variety of European  
primary care settings

HEALTH-F3-2010-257258

**SEVENTH FRAMEWORK PROGRAMME**

**GRANT AGREEMENT No 257258**

**PROJECT TITLE RESTORE**

**Collaborative project**

**Small or medium-scale focused research project**

The **European Union** ("*the Union*"), represented by the **European Commission** (the "*Commission*"),  
of the **one part**,

**and NATIONAL UNIVERSITY OF IRELAND, GALWAY**, established in University Road -, GALWAY, ., Ireland represented by Jacinta Thornton, Commercialisation Executive and/or Neil Ferguson, Commercialisation Executive or their authorised representative, the *beneficiary* acting as "*coordinator*" of the *consortium* (the "*coordinator*"), ("*beneficiary no. 1*"),

of the **other part**

**HAVE AGREED** to the following terms and conditions including those in the following annexes, which form an integral part of this *grant agreement* (the "*grant agreement*").

Annex I - Description of Work

Annex II - General conditions

Annex III - Non applicable

Annex IV - Form A - Accession of *beneficiaries* to the *grant agreement*

Annex V - Form B - Request for accession of a new *beneficiary* to the *grant agreement*

Annex VI - Form C - Financial statement per funding scheme

Annex VII - Form D - Terms of reference for the certificate on the financial statements and Form E

- Terms of reference for the certificate on the methodology

**Article 1 - Accession to the *grant agreement* of the other *beneficiaries***

1. The *coordinator* shall endeavour to ensure that each legal entity identified below accedes to this *grant agreement* as a *beneficiary*, assuming the rights and obligations established by the *grant agreement* with effect from the date on which the *grant agreement* enters into force, by signing Form A in three originals, countersigned by the *coordinator*.

- **THE UNIVERSITY OF LIVERPOOL**, established in Brownlow Hill, Foundation Building 765 , LIVERPOOL, L69 7ZX, United Kingdom represented by Veronica Cannings, Head of Research Support or his authorised representative ("*beneficiary no. 2*"),
- **UNIVERSITY OF GLASGOW**, established in University Avenue, GLASGOW, G12 8QQ, United Kingdom represented by JOE GALLOWAY, CONTRACTS MANAGER and/or ROSS COWAN, CONTRACTS MANAGER or their authorised representative ("*beneficiary no. 3*"),
- **MEDIZINISCHE UNIVERSITAET WIEN**, established in Spitalgasse 23, WIEN, 1090, Austria represented by Wolfgang Schuetz, Rector or his authorised representative ("*beneficiary no. 4*"),

- **STICHTING KATHOLIEKE UNIVERSITEIT**, established in Comeniuslaan 4, NIJMEGEN, 6525 HP, Netherlands represented by HENDRIK-JAN VOS, DIRECTOR VALORISATION/TECHNOLOGY TRANSFER and/or FRANS CORSTENS, DEAN or their authorised representative ("*beneficiary no. 5*"),
- **PANEPISTIMIO KRITIS (UNIVERSITY OF CRETE)**, established in PANEPISTIMIOUPOLI RETHIMNOU (UNIVERSITY CAMPUS, GALLOS, RETHIMNO), RETHYMNON, CRETE, 74100, Greece represented by EMMANUEL PETRAKIS, VICE RECTOR or his authorised representative ("*beneficiary no. 6*"),
- **PINTAIL LTD**, established in SPRINGHILL AVENUE 77, BLACKROCK, Ireland represented by Ciaran Clissmann, Director or his authorised representative ("*beneficiary no. 7*"),

All the *beneficiaries* together form the *consortium* (the "*consortium*").

2. The *coordinator* shall send to the *Commission* one duly completed and signed Form A per *beneficiary* at the latest 45 calendar days after the entry into force of the *grant agreement*. The two remaining signed originals shall be kept, one by the *coordinator* to be made available for consultation at the request of any *beneficiary*, and the other by the *beneficiary* concerned.

3. Should any legal entity identified above, fail or refuse to accede to the *grant agreement* within the deadline established in the previous paragraph, the *Commission* is no longer bound by its offer to the said legal entity(ies). The *consortium* may propose to the *Commission*, within the time-limit to be fixed by the latter, appropriate solutions to ensure the implementation of the *project*. The procedure established in Annex II for amendments to this *grant agreement* will apply.

## Article 2 - Scope

The *Union* has decided to grant a financial contribution for the implementation of the *project* as specified in Annex I, called *REsearch into implementation STRategies to support patients of different ORigins and language background in a variety of European primary care settings (RESTORE)* (the "*project*") within the framework of the *SP1-Cooperation* and under the conditions laid down in this *grant agreement*.

## Article 3 - Duration and start date of the project

The duration of the *project* shall be 48 months from 1st April 2011 (hereinafter referred to as the "*start date*").

## Article 4 - Reporting periods and language of reports

The *project* is divided into reporting periods of the following duration:

- P1: from month 1 to month 18
- P2: from month 19 to month 36
- P3: from month 37 to the last month of the *project*.

Any report and deliverable, when appropriate, required by this *grant agreement* shall be in *English*.

**Article 11 - Entry into force of the grant agreement**

This *grant agreement* shall enter into force after its signature by the coordinator and the *Commission*, on the day of the last signature.

Done in two originals in English.

For the *coordinator* done at GALWAY

For the *Commission* done at Brussels

NATIONAL UNIVERSITY OF IRELAND, GALWAY

Name of the legal entity

Ruxandra DRAGHIA-AKLI  
Director

JACINDA THORNTON

Name of the legal representative

Name of the legal representative

Stamp of the organisation (if applicable)



Signature of legal representative



Signature of legal representative

17/11/10

Date

31 DEC. 2010

Date

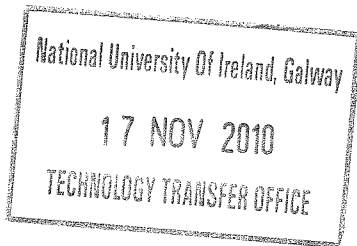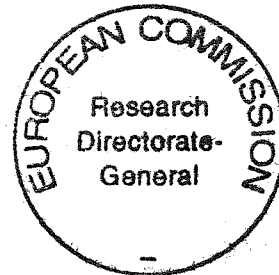

Supplement: 1748-5908-7-111-S1.pdf [file 1748-5908-7-111-S1.pdf]
